# Supplementary figures and images for: Aphids and Mycorrhizal Fungi Shape Maternal Effects in Senecio vulgaris
Source: MDPI journal article supplement (doi:10.3390/plants11162150), 2022-08-18

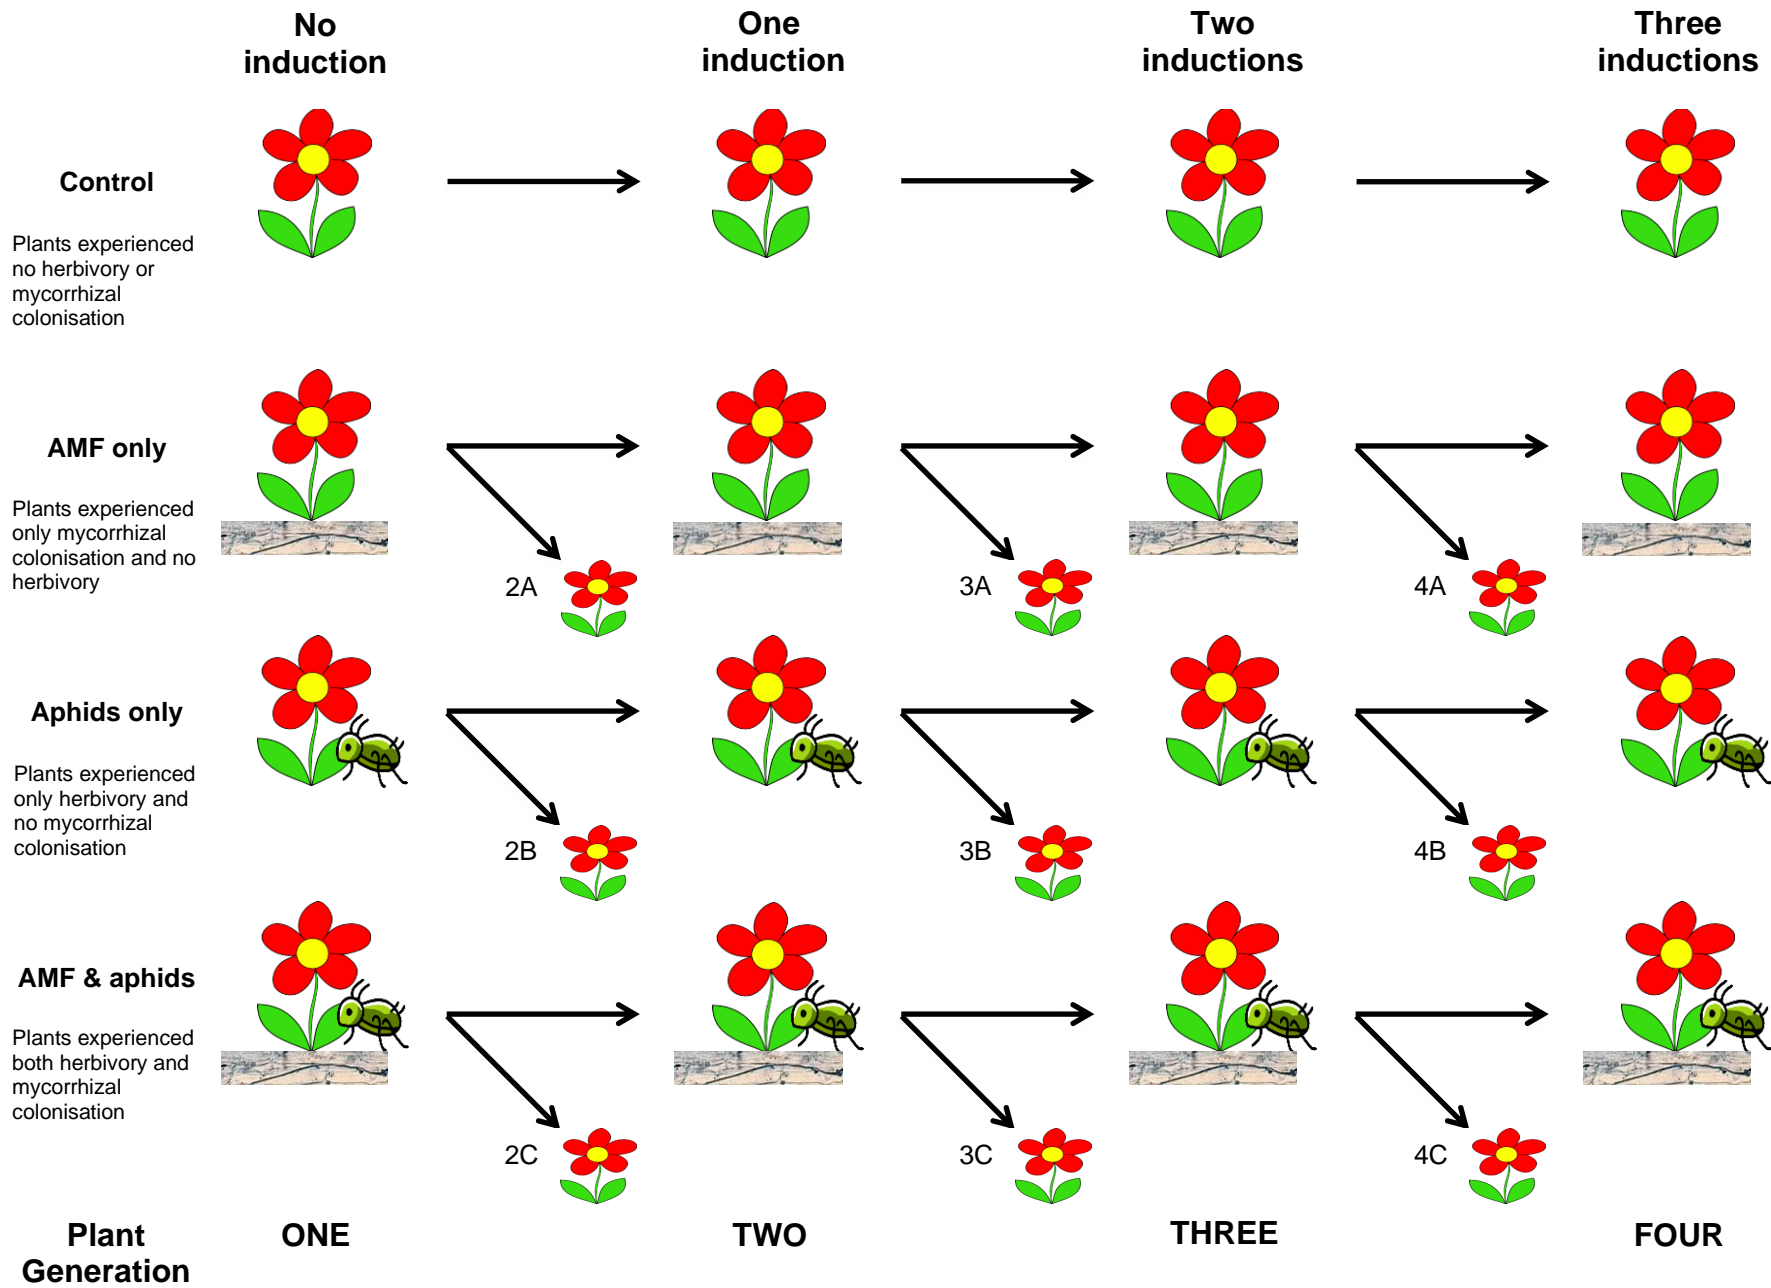

Supplement: s1 [file s1]
